# Supplementary material for: Nutritional Status of Kidney and Pancreas Transplant Candidates - Experience of the One Polish Transplant Center (Observational Study)
Source: Preprints.org preprint supplement (doi:10.20944/preprints202307.1137.v1), 2023-07-18
Supplement: Supplementary file 1 [file supplementary]

## Sheet: Arkusz7
	wiek	WBC	LY	NEU	RBC	HCT	HGB	MCV	KREA	EGFR	UREA	GLU	CHOL	HDL	LDL,W	TG	CA	PTH	NA,	K	TP	ALB	waga	wzrost	BMI	PNIO	NRI	NMCLorenz	Neulimf
wiek	1	-0.22287	-0.126765	-0.138498	0.145951	0.277411	0.252964	0.333892	-0.106742	-0.038813	-0.0688708	-0.176873	0.0971427	-0.0638606	0.275464	-0.0590543	-0.0219884	0.158301	0.170456	-0.155775	0.30929	0.0128216	0.362995	0.255497	0.332972	0.0127883	0.262849	0.225742	0.0717694
WBC	-0.22287	1	-0.15074	0.931684	-0.256018	-0.234054	-0.266013	-0.0441749	0.00467172	0.0202016	0.162452	0.150918	-0.0290165	0.0360994	-0.0104878	-0.00171457	0.0952346	-0.0938433	-0.0204707	-0.0340043	-0.070424	0.0127307	-0.191945	-0.0130797	-0.251992	0.0126135	-0.121433	-0.00714075	0.356712
LY	-0.126765	-0.15074	1	-0.473079	0.252622	0.147706	0.184671	-0.0763642	-0.165587	0.0558734	-0.0255808	-0.00350163	0.0321275	-0.129034	-0.0259883	-0.055324	0.0840489	-0.286236	0.0813666	-0.0243067	0.315965	0.0834274	-0.140295	-0.246852	-0.0557605	0.0841253	0.00317222	-0.216619	-0.566665
NEU	-0.138498	0.931684	-0.473079	1	-0.348122	-0.299015	-0.338345	-0.0297204	0.0619888	0.00321625	0.157599	0.126601	-0.0177151	0.0788367	0.0284376	0.0242109	0.0575983	0.0334525	-0.0468659	-0.0383662	-0.149858	0.00406119	-0.156089	0.040331	-0.229959	0.00372628	-0.116237	0.0415636	0.522495
RBC	0.145951	-0.256018	0.252622	-0.348122	1	0.91873	0.931754	-0.195467	-0.0773043	0.113708	-0.0383906	-0.145307	0.0779376	0.000132278	0.118495	-0.209102	0.041471	-0.269243	-0.1346	0.168598	0.0170901	-0.0459009	0.1956	0.137163	0.161577	-0.0456804	0.0181926	0.164095	-0.298739
HCT	0.277411	-0.234054	0.147706	-0.299015	0.91873	1	0.981302	0.163922	-0.0441496	0.0361535	-0.0957417	-0.151157	0.112288	0.0149726	0.184035	-0.101394	0.113667	-0.217876	-0.0680313	0.207703	0.123798	0.0852754	0.245204	0.175491	0.21588	0.0854386	0.186907	0.19037	-0.239364
HGB	0.252964	-0.266013	0.184671	-0.338345	0.931754	0.981302	1	0.122975	-0.0308549	0.0267538	-0.0727427	-0.157549	0.114178	0.0266359	0.179149	-0.130747	0.0863527	-0.207263	-0.0481484	0.166846	0.127071	0.0746274	0.226088	0.149109	0.202414	0.074819	0.157857	0.17725	-0.270694
MCV	0.333892	-0.0441749	-0.0763642	-0.0297204	-0.195467	0.163922	0.122975	1	0.109883	-0.290528	-0.145043	-0.0475509	0.138241	0.0710261	0.125226	0.263678	0.227534	0.0781436	0.108105	0.10222	0.43573	0.401727	-0.00416063	-0.0626935	0.0654727	0.401737	0.447565	-0.112139	-0.0157099
KREA	-0.106742	0.00467172	-0.165587	0.0619888	-0.0773043	-0.0441496	-0.0308549	0.109883	1	-0.735233	0.399589	-0.121033	0.0502657	-0.0437529	0.0362943	0.0764327	-0.167167	0.33281	-0.250184	0.322004	-0.168205	0.0471997	-0.10424	-0.0651878	-0.0719537	0.0471242	0.0833404	-0.051991	0.0162995
EGFR	-0.038813	0.0202016	0.0558734	0.00321625	0.113708	0.0361535	0.0267538	-0.290528	-0.735233	1	-0.0950076	-0.000127368	-0.232305	-0.129269	-0.198762	-0.150828	0.112599	-0.218783	0.234949	-0.205697	-0.0213496	-0.103297	0.360218	0.301936	0.238641	-0.103355	-0.148345	0.32204	-0.0312617
UREA	-0.0688708	0.162452	-0.0255808	0.157599	-0.0383906	-0.0957417	-0.0727427	-0.145043	0.399589	-0.0950076	1	0.0114836	-0.210772	-0.0748847	-0.0545142	-0.130327	-0.0849084	0.0696626	-0.172106	0.109499	-0.095786	0.0370356	0.232269	0.331204	0.0896915	0.0370074	0.00481228	0.326364	0.08006
GLU	-0.176873	0.150918	-0.00350163	0.126601	-0.145307	-0.151157	-0.157549	-0.0475509	-0.121033	-0.000127368	0.0114836	1	-0.00642198	0.0121983	0.00334875	-0.00151197	0.149347	-0.0782095	-0.103252	0.0441416	-0.0149915	-0.149947	-0.211105	-0.0454334	-0.261146	-0.149943	-0.350384	-0.0640428	0.0473663
CHOL	0.0971427	-0.0290165	0.0321275	-0.0177151	0.0779376	0.112288	0.114178	0.138241	0.0502657	-0.232305	-0.210772	-0.00642198	1	0.30177	0.837592	0.469383	0.261882	-0.00872361	0.141062	0.193125	0.16854	0.161884	-0.274109	-0.402253	-0.0819161	0.161884	0.17071	-0.414799	-0.176996
HDL	-0.0638606	0.0360994	-0.129034	0.0788367	0.000132278	0.0149726	0.0266359	0.0710261	-0.0437529	-0.129269	-0.0748847	0.0121983	0.30177	1	-0.00846521	-0.194295	0.087208	-0.0800019	-0.0961316	-0.0468207	-0.14838	-0.00212063	-0.254775	-0.198136	-0.191359	-0.00220105	-0.0367296	-0.285117	0.0670678
LDL-W	0.275464	-0.0104878	-0.0259883	0.0284376	0.118495	0.184035	0.179149	0.125226	0.0362943	-0.198762	-0.0545142	0.00334875	0.837592	-0.00846521	1	0.287682	0.338613	0.0445118	0.0989643	0.2212	0.192151	0.206641	-0.0930375	-0.122847	-0.0257202	0.206604	0.224221	-0.12383	-0.16973
TG	-0.0590543	-0.00171457	-0.055324	0.0242109	-0.209102	-0.101394	-0.130747	0.263678	0.0764327	-0.150828	-0.130327	-0.00151197	0.469383	-0.194295	0.287682	1	0.109771	-0.0359522	0.135648	0.0468247	0.112281	0.226272	-0.076496	-0.267837	0.0797117	0.226213	0.297004	-0.249881	0.151881
CA	-0.0219884	0.0952346	0.0840489	0.0575983	0.041471	0.113667	0.0863527	0.227534	-0.167167	0.112599	-0.0849084	0.149347	0.261882	0.087208	0.338613	0.109771	1	-0.0360444	-0.222504	0.281884	0.44218	0.510956	-0.0457958	0.173921	-0.163913	0.511	0.230723	0.186082	-0.372594
PTH	0.158301	-0.0938433	-0.286236	0.0334525	-0.269243	-0.217876	-0.207263	0.0781436	0.33281	-0.218783	0.0696626	-0.0782095	-0.00872361	-0.0800019	0.0445118	-0.0359522	-0.0360444	1	-0.111513	0.116704	0.0983204	0.122898	0.0940641	0.153226	0.0337987	0.12274	0.140296	0.166643	0.0158041
NA	0.170456	-0.0204707	0.0813666	-0.0468659	-0.1346	-0.0680313	-0.0481484	0.108105	-0.250184	0.234949	-0.172106	-0.103252	0.141062	-0.0961316	0.0989643	0.135648	-0.222504	-0.111513	1	-0.368702	0.0865092	-0.00384018	0.31219	-0.00705472	0.413622	-0.00381468	0.235247	0.0261245	0.0055912
K	-0.155775	-0.0340043	-0.0243067	-0.0383662	0.168598	0.207703	0.166846	0.10222	0.322004	-0.205697	0.109499	0.0441416	0.193125	-0.0468207	0.2212	0.0468247	0.281884	0.116704	-0.368702	1	-0.00395865	0.24389	-0.00330822	0.0338714	-0.00965983	0.243848	0.223853	0.0378185	-0.190294
TP	0.30929	-0.070424	0.315965	-0.149858	0.0170901	0.123798	0.127071	0.43573	-0.168205	-0.0213496	-0.095786	-0.0149915	0.16854	-0.14838	0.192151	0.112281	0.44218	0.0983204	0.0865092	-0.00395865	1	0.818514	-0.106727	-0.0554958	-0.0880989	0.818688	0.568662	-0.032093	-0.223217
ALB	0.0128216	0.0127307	0.0834274	0.00406119	-0.0459009	0.0852754	0.0746274	0.401727	0.0471997	-0.103297	0.0370356	-0.149947	0.161884	-0.00212063	0.206641	0.226272	0.510956	0.122898	-0.00384018	0.24389	0.818514	1	-0.0347806	0.0104265	-0.0489999	1	0.783768	0.0498844	-0.134736
waga	0.362995	-0.191945	-0.140295	-0.156089	0.1956	0.245204	0.226088	-0.00416063	-0.10424	0.360218	0.232269	-0.211105	-0.274109	-0.254775	-0.0930375	-0.076496	-0.0457958	0.0940641	0.31219	-0.00330822	-0.106727	-0.0347806	1	0.702305	0.876106	-0.0349566	0.453359	0.717783	-0.0201463
wzrost	0.255497	-0.0130797	-0.246852	0.040331	0.137163	0.175491	0.149109	-0.0626935	-0.0651878	0.301936	0.331204	-0.0454334	-0.402253	-0.198136	-0.122847	-0.267837	0.173921	0.153226	-0.00705472	0.0338714	-0.0554958	0.0104265	0.702305	1	0.282308	0.010221	0.0980714	0.968043	0.0581897
BMI	0.332972	-0.251992	-0.0557605	-0.229959	0.161577	0.21588	0.202414	0.0654727	-0.0719537	0.238641	0.0896915	-0.261146	-0.0819161	-0.191359	-0.0257202	0.0797117	-0.163913	0.0337987	0.413622	-0.00965983	-0.0880989	-0.0489999	0.876106	0.282308	1	-0.0490986	0.565826	0.312783	-0.0527793
PNIO	0.0127883	0.0126135	0.0841253	0.00372628	-0.0456804	0.0854386	0.074819	0.401737	0.0471242	-0.103355	0.0370074	-0.149943	0.161884	-0.00220105	0.206604	0.226213	0.511	0.12274	-0.00381468	0.243848	0.818688	1	-0.0349566	0.010221	-0.0490986	1	0.783714	0.0496907	-0.135129
NRI	0.262849	-0.121433	0.00317222	-0.116237	0.0181926	0.186907	0.157857	0.447565	0.0833404	-0.148345	0.00481228	-0.350384	0.17071	-0.0367296	0.224221	0.297004	0.230723	0.140296	0.235247	0.223853	0.568662	0.783768	0.453359	0.0980714	0.565826	0.783714	1	0.111075	-0.109319
NMCLorenz	0.225742	-0.00714075	-0.216619	0.0415636	0.164095	0.19037	0.17725	-0.112139	-0.051991	0.32204	0.326364	-0.0640428	-0.414799	-0.285117	-0.12383	-0.249881	0.186082	0.166643	0.0261245	0.0378185	-0.032093	0.0498844	0.717783	0.968043	0.312783	0.0496907	0.111075	1	0.00744702
Neulimf	0.0717694	0.356712	-0.566665	0.522495	-0.298739	-0.239364	-0.270694	-0.0157099	0.0162995	-0.0312617	0.08006	0.0473663	-0.176996	0.0670678	-0.16973	0.151881	-0.372594	0.0158041	0.0055912	-0.190294	-0.223217	-0.134736	-0.0201463	0.0581897	-0.0527793	-0.135129	-0.109319	0.00744702	1
	wiek	WBC	LY	NEU	RBC	HCT	HGB	MCV	KREA	EGFR	UREA	GLU	CHOL	HDL	LDL,W	TG	CA	PTH	NA,	K	TP	ALB	waga	wzrost	BMI	PNIO	NRI	NMCLorenz	Neulimf
wiek	NA	0.0926463	0.343011	0.299822	0.274306	0.0350066	0.0553825	0.0104233	0.421013	0.770394	0.604246	0.184112	0.468188	0.669778	0.0580916	0.66258	0.872208	0.235291	0.209107	0.251615	0.0435735	0.929581	0.0047187	0.0508113	0.00996976	0.929763	0.0651551	0.085591	0.592392
WBC	0.0926463	NA	0.258695	0	0.0524046	0.0770027	0.0435581	0.741957	0.972236	0.880356	0.22308	0.262461	0.830343	0.811743	0.944221	0.989994	0.489169	0.487469	0.882072	0.805325	0.657637	0.930816	0.148893	0.922371	0.0563577	0.931452	0.405879	0.957573	0.00598588
LY	0.343011	0.258695	NA	0.000176681	0.0557243	0.268514	0.165207	0.568851	0.214157	0.676984	0.848833	0.979376	0.812467	0.392748	0.862338	0.685492	0.541804	0.0308857	0.554821	0.860177	0.0415056	0.568738	0.293535	0.0617532	0.677601	0.565497	0.982741	0.102413	3.53469e-06
NEU	0.299822	0	0.000176681	NA	0.00741004	0.0226018	0.00938298	0.82473	0.643894	0.980884	0.237401	0.348027	0.895939	0.602511	0.849507	0.859416	0.676169	0.804881	0.73403	0.780937	0.343514	0.977906	0.24198	0.763729	0.0824672	0.979727	0.426407	0.756727	2.58627e-05
RBC	0.274306	0.0524046	0.0557243	0.00741004	NA	0	0	0.141439	0.564088	0.395388	0.77479	0.280821	0.564441	0.999304	0.427612	0.121952	0.763703	0.0428394	0.327203	0.218522	0.914454	0.754146	0.141163	0.304549	0.225616	0.755291	0.901259	0.218371	0.0227333
HCT	0.0350066	0.0770027	0.268514	0.0226018	0	NA	0	0.218866	0.742099	0.787598	0.474659	0.261696	0.405631	0.921329	0.2156	0.457138	0.408635	0.103502	0.621647	0.128101	0.434742	0.560176	0.0635672	0.187618	0.103618	0.559422	0.198464	0.152321	0.0703481
HGB	0.0553825	0.0435581	0.165207	0.00938298	0	0	NA	0.357751	0.818152	0.841988	0.587369	0.241823	0.397723	0.86052	0.228245	0.336811	0.530743	0.121867	0.72703	0.223414	0.4226	0.610319	0.0879102	0.263945	0.127557	0.6094	0.278682	0.183163	0.0398589
MCV	0.0104233	0.741957	0.568851	0.82473	0.141439	0.218866	0.357751	NA	0.411578	0.0269399	0.277337	0.725403	0.305123	0.639028	0.40164	0.0495781	0.0947858	0.563409	0.432089	0.457713	0.00392285	0.00422173	0.975272	0.640123	0.625341	0.00422069	0.0012621	0.401986	0.906824
KREA	0.421013	0.972236	0.214157	0.643894	0.564088	0.742099	0.818152	0.411578	NA	3.33378e-11	0.00171639	0.365451	0.707872	0.770273	0.806529	0.572008	0.21816	0.0106907	0.062932	0.0155141	0.280945	0.744809	0.432045	0.623762	0.588119	0.745203	0.565019	0.695745	0.903343
EGFR	0.770394	0.880356	0.676984	0.980884	0.395388	0.787598	0.841988	0.0269399	3.33378e-11	NA	0.47413	0.999243	0.0792994	0.386491	0.175633	0.26275	0.408669	0.098945	0.081328	0.128287	0.891909	0.475316	0.00507188	0.0201187	0.0687267	0.475066	0.303888	0.0128694	0.815795
UREA	0.604246	0.22308	0.848833	0.237401	0.77479	0.474659	0.587369	0.277337	0.00171639	0.47413	NA	0.93182	0.112253	0.61689	0.712871	0.333905	0.533817	0.60333	0.204667	0.42177	0.541193	0.798457	0.0766905	0.0103963	0.499323	0.798607	0.973541	0.0116455	0.550236
GLU	0.184112	0.262461	0.979376	0.348027	0.280821	0.261696	0.241823	0.725403	0.365451	0.999243	0.93182	NA	0.962186	0.935141	0.981978	0.991176	0.27648	0.563079	0.45316	0.748969	0.924927	0.30378	0.111675	0.734871	0.0476987	0.303793	0.0135807	0.632928	0.726428
CHOL	0.468188	0.830343	0.812467	0.895939	0.564441	0.405631	0.397723	0.305123	0.707872	0.0792994	0.112253	0.962186	NA	0.0392596	1.15685e-13	0.000230237	0.0534322	0.948649	0.304295	0.157746	0.285991	0.266446	0.0373266	0.00174714	0.540999	0.266447	0.240896	0.00120607	0.187801
HDL	0.669778	0.811743	0.392748	0.602511	0.999304	0.921329	0.86052	0.639028	0.770273	0.386491	0.61689	0.935141	0.0392596	NA	0.955988	0.195707	0.568926	0.597142	0.534766	0.762806	0.417669	0.989777	0.0839409	0.181859	0.197569	0.98939	0.824323	0.052069	0.657869
LDL-W	0.0580916	0.944221	0.862338	0.849507	0.427612	0.2156	0.228245	0.40164	0.806529	0.175633	0.712871	0.981978	1.15685e-13	0.955988	NA	0.0499006	0.0213439	0.763867	0.517773	0.144219	0.292075	0.206891	0.529376	0.405505	0.862238	0.206974	0.169987	0.401729	0.254047
TG	0.66258	0.989994	0.685492	0.859416	0.121952	0.457138	0.336811	0.0495781	0.572008	0.26275	0.333905	0.991176	0.000230237	0.195707	0.0499006	NA	0.42943	0.792505	0.32807	0.736703	0.484595	0.121991	0.571688	0.0439792	0.555582	0.122091	0.0403665	0.0608443	0.263807
CA	0.872208	0.489169	0.541804	0.676169	0.763703	0.408635	0.530743	0.0947858	0.21816	0.408669	0.533817	0.27648	0.0534322	0.568926	0.0213439	0.42943	NA	0.793894	0.109293	0.0408663	0.00379612	0.000242589	0.737512	0.199861	0.227382	0.000242237	0.118689	0.169711	0.00508798
PTH	0.235291	0.487469	0.0308857	0.804881	0.0428394	0.103502	0.121867	0.563409	0.0106907	0.098945	0.60333	0.563079	0.948649	0.597142	0.763867	0.792505	0.793894	NA	0.417628	0.396146	0.535611	0.400196	0.48247	0.250832	0.80114	0.400804	0.336309	0.211208	0.907112
NA	0.209107	0.882072	0.554821	0.73403	0.327203	0.621647	0.72703	0.432089	0.062932	0.081328	0.204667	0.45316	0.304295	0.534766	0.517773	0.32807	0.109293	0.417628	NA	0.00517185	0.581223	0.978885	0.0191603	0.958845	0.00153143	0.979025	0.100063	0.848431	0.967684
K	0.251615	0.805325	0.860177	0.780937	0.218522	0.128101	0.223414	0.457713	0.0155141	0.128287	0.42177	0.748969	0.157746	0.762806	0.144219	0.736703	0.0408663	0.396146	0.00517185	NA	0.9799	0.0878553	0.980695	0.80427	0.943669	0.0879105	0.118111	0.781992	0.164044
TP	0.0435735	0.657637	0.0415056	0.343514	0.914454	0.434742	0.4226	0.00392285	0.280945	0.891909	0.541193	0.924927	0.285991	0.417669	0.292075	0.484595	0.00379612	0.535611	0.581223	0.9799	NA	2.02074e-11	0.495755	0.723744	0.57427	1.98481e-11	6.93509e-05	0.83812	0.15533
ALB	0.929581	0.930816	0.568738	0.977906	0.754146	0.560176	0.610319	0.00422173	0.744809	0.475316	0.798457	0.30378	0.266446	0.989777	0.206891	0.121991	0.000242589	0.400196	0.978885	0.0878553	2.02074e-11	NA	0.810494	0.942711	0.735422	0	1.6974e-11	0.730825	0.355996
waga	0.0047187	0.148893	0.293535	0.24198	0.141163	0.0635672	0.0879102	0.975272	0.432045	0.00507188	0.0766905	0.111675	0.0373266	0.0839409	0.529376	0.571688	0.737512	0.48247	0.0191603	0.980695	0.495755	0.810494	NA	5.69322e-10	0	0.809553	0.000945233	1.57629e-10	0.880682
wzrost	0.0508113	0.922371	0.0617532	0.763729	0.304549	0.187618	0.263945	0.640123	0.623762	0.0201187	0.0103963	0.734871	0.00174714	0.181859	0.405505	0.0439792	0.199861	0.250832	0.958845	0.80427	0.723744	0.942711	5.69322e-10	NA	0.030286	0.943838	0.498047	0	0.664375
BMI	0.00996976	0.0563577	0.677601	0.0824672	0.225616	0.103618	0.127557	0.625341	0.588119	0.0687267	0.499323	0.0476987	0.540999	0.197569	0.862238	0.555582	0.227382	0.80114	0.00153143	0.943669	0.57427	0.735422	0	0.030286	NA	0.734909	1.85051e-05	0.0158659	0.693965
PNIO	0.929763	0.931452	0.565497	0.979727	0.755291	0.559422	0.6094	0.00422069	0.745203	0.475066	0.798607	0.303793	0.266447	0.98939	0.206974	0.122091	0.000242237	0.400804	0.979025	0.0879105	1.98481e-11	0	0.809553	0.943838	0.734909	NA	1.70635e-11	0.731831	0.35458
NRI	0.0651551	0.405879	0.982741	0.426407	0.901259	0.198464	0.278682	0.0012621	0.565019	0.303888	0.973541	0.0135807	0.240896	0.824323	0.169987	0.0403665	0.118689	0.336309	0.100063	0.118111	6.93509e-05	1.6974e-11	0.000945233	0.498047	1.85051e-05	1.70635e-11	NA	0.442527	0.454626
NMCLorenz	0.085591	0.957573	0.102413	0.756727	0.218371	0.152321	0.183163	0.401986	0.695745	0.0128694	0.0116455	0.632928	0.00120607	0.052069	0.401729	0.0608443	0.169711	0.211208	0.848431	0.781992	0.83812	0.730825	1.57629e-10	0	0.0158659	0.731831	0.442527	NA	0.955755
Neulimf	0.592392	0.00598588	3.53469e-06	2.58627e-05	0.0227333	0.0703481	0.0398589	0.906824	0.903343	0.815795	0.550236	0.726428	0.187801	0.657869	0.254047	0.263807	0.00508798	0.907112	0.967684	0.164044	0.15533	0.355996	0.880682	0.664375	0.693965	0.35458	0.454626	0.955755	NA
